# Supplementary material for: Racial and Ethnic Differences in Barriers Faced by Medical College Admission Test Examinees and Their Association With Medical School Application and Matriculation
Source: PubMed Central journal article supplement (PMC10105307; doi:10.1001/jamahealthforum.2023.0498), 2023-04-14
Supplement: jamahealthforum-e230498-s002.pdf [file jamahealthforum-e230498-s002.pdf]

## Data Sharing Statement

Faiz. Racial and Ethnic Differences in Barriers Faced by Medical College Admission Test Examinees and Their Association With Medical School Application and Matriculation. *JAMA Health Forum*. Published April 14, 2023. doi:10.1001/jamahealthforum.2023.0498

### Data

**Data available:** No

### Additional Information

**Explanation for why data not available:** The data are protected under a DUA with the AAMC.
